# Supplementary material
Source: PubMed Central journal article supplement (PMC7560213)
Supplement: EMBJ-39-e104708-s001.pdf [file EMBJ-39-e104708-s001.pdf]

## Appendix

### The tRNA pseudouridine synthase TruB1 regulates the maturation of let-7 miRNA

Ryota Kurimoto<sup>1</sup>, Tomoki Chiba<sup>1</sup>, Yoshiaki Ito<sup>1,2</sup>, Takahide Matsushima<sup>1</sup>, Yuki Yano<sup>1</sup>, Kohei Miyata<sup>3</sup>, Yuka Yashiro<sup>5</sup>, Tsutomu Suzuki<sup>4</sup>, Kozo Tomita<sup>5</sup>, Hiroshi Asahara<sup>1,6,7, \*</sup>.

<sup>1</sup>Department of Systems BioMedicine, Graduate School of Medical and Dental Sciences, Tokyo Medical and Dental University (TMDU), Bunkyo-ku, Tokyo 113-8520, Japan; <sup>2</sup>Research Core, Research Facility Cluster, Institute of Research, Tokyo Medical and Dental University (TMDU), Bunkyo-ku, Tokyo 113-8520, Japan; <sup>3</sup>Department Obstetrics and Gynecology, Faculty of Medicine, Fukuoka University, Fukuoka 814-0180, Japan.; <sup>4</sup>Department of Chemistry and Biotechnology, Graduate School of Engineering, University of Tokyo, Bunkyo-ku, Tokyo 113-8656, Japan; <sup>5</sup>Department of Computational Biology and Medical Sciences, Graduate School of Frontier Sciences, The University of Tokyo, Kashiwa, Chiba 277-8562, Japan; <sup>6</sup>Department of Molecular and Experimental Medicine, The Scripps Research Institute, San Diego, CA, USA. <sup>7</sup>Lead Contact.

## Table of Contents

### 1. Reagents and Tools Table

## Reagents and Tools Table

| Reagent/Resource                                                                                                                                                   | Reference or Source                                                                                                                                                                                                                                           | Identifier or Catalog Number                                                                                   |
|--------------------------------------------------------------------------------------------------------------------------------------------------------------------|---------------------------------------------------------------------------------------------------------------------------------------------------------------------------------------------------------------------------------------------------------------|----------------------------------------------------------------------------------------------------------------|
|                                                                                                                                                                    | <p><b>Source (public):</b> Stock center, company, other labs</p> <p><b>Reference:</b> list relevant study (e.g. Smith et al, 2017) if referring to previously published work; use “this study” if new.</p> <p><b>If neither applies:</b> briefly explain.</p> | Provide catalog numbers, stock numbers, database IDs or accession numbers, RRDs or other relevant identifiers. |
| <p><b>Experimental Models</b></p> <p>List cell lines, model organism strains, patient samples, isolated cell types etc. Indicate the species when appropriate.</p> |                                                                                                                                                                                                                                                               |                                                                                                                |
| Human cell line: HEK293FT                                                                                                                                          | Thermo Fisher Scientific                                                                                                                                                                                                                                      | Cat# R70007                                                                                                    |
| Human cell line: A549                                                                                                                                              | ATCC                                                                                                                                                                                                                                                          | Cat# ATCC® CCL-185                                                                                             |
| Human cell line: HeLa                                                                                                                                              | ATCC                                                                                                                                                                                                                                                          | Cat# ATCC® CCL-2                                                                                               |
| <i>E. coli</i> BL21 (DE3)                                                                                                                                          | Novagen                                                                                                                                                                                                                                                       | Cat# 69450                                                                                                     |
| <i>E. coli</i> DH5α Competent Cells                                                                                                                                | Takara                                                                                                                                                                                                                                                        | Cat# 9057                                                                                                      |
| <p><b>Recombinant DNA</b></p> <p>Indicate species for genes and proteins when appropriate</p>                                                                      |                                                                                                                                                                                                                                                               |                                                                                                                |
| pcDNA3.1 (+)                                                                                                                                                       | Thermo Fisher Scientific                                                                                                                                                                                                                                      | Cat# V79020                                                                                                    |
| pcDNA3.1 containing GFP, TruB1 or its mutants sequences; see Materials and Methods and Appendix Table S4                                                           | This study                                                                                                                                                                                                                                                    | n/a                                                                                                            |
| pLuc AKP                                                                                                                                                           | Our lab (Ito et al., 2017)                                                                                                                                                                                                                                    | n/a                                                                                                            |
| pLuc AKP containing antisense of let-7a or 3'UTR of KRAS sequences; see Materials and Methods and Appendix Table S4                                                | This study                                                                                                                                                                                                                                                    | n/a                                                                                                            |
| pRL-SV40                                                                                                                                                           | Promega                                                                                                                                                                                                                                                       | Cat# E2231                                                                                                     |
| pCS2                                                                                                                                                               | Riken                                                                                                                                                                                                                                                         | Cat# RDB15116                                                                                                  |
| pCLT; See Appendix Table S5                                                                                                                                        | This study                                                                                                                                                                                                                                                    | n/a                                                                                                            |
| pCLT containing GFP, TruB1 or its mutants sequences; see Materials and Methods and Appendix Table S4                                                               | This study                                                                                                                                                                                                                                                    | n/a                                                                                                            |
| pCMV-VSVG-RSV-Rev                                                                                                                                                  | Addgene                                                                                                                                                                                                                                                       | Cat# #8454                                                                                                     |

|                                                                                                                                                                                                                                                                                                                                             |                           |                                |
|---------------------------------------------------------------------------------------------------------------------------------------------------------------------------------------------------------------------------------------------------------------------------------------------------------------------------------------------|---------------------------|--------------------------------|
| pCAG-HIVgp                                                                                                                                                                                                                                                                                                                                  | Addgene                   | Cat# #35616                    |
| pET22b                                                                                                                                                                                                                                                                                                                                      | Merck Millipore           | Cat# 69744                     |
| pET22b containing TruB1 or its mutants sequences; see Materials and Methods and Appendix Table S4                                                                                                                                                                                                                                           | This study                | n/a                            |
| <b>Antibodies</b><br><i>Include the name of the antibody, the company (or lab) who supplied the antibody, the catalogue or clone number, the host species in which the antibody was raised and mention whether the antibody is monoclonal or polyclonal. Please indicate the concentrations used for different experimental procedures.</i> |                           |                                |
| Anti-DDDDK-tag mAb (Flag, FLA-1)                                                                                                                                                                                                                                                                                                            | MBL                       | Cat# M185-3L; RRID: AB_2687989 |
| DGCR8 antibody                                                                                                                                                                                                                                                                                                                              | Abcam                     | Cat# Ab90579; RRID: AB_2049575 |
| LIN28B (D4H1) antibody                                                                                                                                                                                                                                                                                                                      | Cell Signaling Technology | Cat# 11965; RRID: AB_2750978   |
| Monoclonal Anti-beta-Actin antibody produced in mouse                                                                                                                                                                                                                                                                                       | Sigma-Aldrich             | Cat# A5316; RRID: AB_476743    |
| Anti-Mouse IgG, HRP-Linked Whole Ab Sheep                                                                                                                                                                                                                                                                                                   | GE Healthcare             | Cat# NA931                     |
| Anti-Rabbit IgG, HRP-Linked Whole Ab Donkey                                                                                                                                                                                                                                                                                                 | GE Healthcare             | Cat# NA934                     |
| <b>Oligonucleotides and other sequence-based reagents</b><br><i>For long lists of oligos or other sequences please refer to the relevant Table(s) or EV Table(s)</i>                                                                                                                                                                        |                           |                                |
| See appendix Table S4 for all sequences of primers, probe and other nucleotides used in this paper.                                                                                                                                                                                                                                         |                           |                                |
| <b>Chemicals, Enzymes and other reagents</b><br><i>(e.g. drugs, peptides, recombinant proteins, dyes etc.)</i>                                                                                                                                                                                                                              |                           |                                |
| EcoR1                                                                                                                                                                                                                                                                                                                                       | Takara                    | Cat# 1040A                     |

|                                         |                             |                |
|-----------------------------------------|-----------------------------|----------------|
| Xho1                                    | Takara                      | Cat# 1094A     |
| Kpn1                                    | Takara                      | Cat# 1068A     |
| Nhe1                                    | Takara                      | Cat# 1241A     |
| Nde1                                    | Takara                      | Cat# 1161A     |
| BamH1                                   | Takara                      | Cat# 1010A     |
| Not1                                    | Takara                      | Cat# 1166A     |
| PrimeSTAR Max DNA Polymerase            | Takara                      | Cat# R045A     |
| DMEM medium                             | Sigma Aldrich               | Cat# D5796     |
| FBS, Qualified                          | Gibco                       | Cat# 10270106  |
| OptiMEM                                 | Gibco                       | Cat# 31985070  |
| Penicillin-Streptomycin Solution        | Wako                        | Cat# 16823191  |
| Lipofectamine RNAiMAX                   | Thermo Fisher Scientific    | Cat# 13778100  |
| Fugene HD Transfection Reagent          | Promega                     | Cat# E2311     |
| Doxycycline                             | Clontech                    | Cat# 631311    |
| PEI Max reagent                         | Polysciences                | Cat# 24765-1   |
| Polybrene                               | Merck Millipore             | Cat# TR-1003   |
| Puromycin                               | Thermo Fisher Scientific    | Cat# A1113802  |
| Alt-R® CRISPR-Cas9 crRNA; See Table S4  | Integrated DNA Technologies | n/a            |
| Alt-R® CRISPR-Cas9 tracrRNA             | Integrated DNA Technologies | Cat# 1072532   |
| Nuclease Free Duplex Buffer             | Integrated DNA Technologies | Cat# 11010301  |
| Alt-R® S.p. Cas9 Nuclease V3            | Integrated DNA Technologies | Cat# 1081059   |
| Trizma® base                            | Sigma Aldrich               | Cat# T1503     |
| Urea                                    | Nacalai tesque              | Cat# 35940-81  |
| Chloroform                              | Wako                        | Cat# 038-02606 |
| HCL                                     | Wako                        | Cat# 086-03925 |
| 2-Propanol (isopropanol)                | Wako                        | Cat# 166-04831 |
| Glycerol                                | Wako                        | Cat# 075-00611 |
| 3M Sodium Acetate                       | NIPPON GENE                 | Cat# 316-90081 |
| Polyoxyethylene(20)Sorbitan Monolaurate | Wako                        | Cat# 166-21115 |
| ISOGEN                                  | NIPPON GENE                 | Cat# 311-02501 |
| THUNDERBIRD® SYBR qPCR Mix              | TOYOBO                      | Cat# QPS-201   |
| THUNDERBIRD® Probe qPCR Mix             | TOYOBO                      | Cat# QPS-101   |
| 32P-γ-ATP                               | Perkin Elmer                | Cat# NEG502Z   |
| 32P-α-UTP                               | Perkin Elmer                | Cat# NEG507T   |
| T4PNK                                   | Takara                      | Cat# 2021S     |
| Gel loading buffer II                   | Thermo Fisher Scientific    | Cat# AM8547    |
| Expresshyb                              | Clontech                    | Cat# 636832    |
| EDTA                                    | Wako                        | Cat# 345-01865 |
| Boric Acid                              | Wako                        | Cat# 021-02195 |

|                                                            |                                                                                       |                 |
|------------------------------------------------------------|---------------------------------------------------------------------------------------|-----------------|
| Citric Acid (for SSC)                                      | Wako                                                                                  | Cat# 038-06925  |
| SDS                                                        | Wako                                                                                  | Cat# 191-07145  |
| TaqMan™ Universal PCR Master Mix, No AmpErase UNG          | Thermo Fisher Scientific                                                              | Cat# 4324018    |
| DOC                                                        | Wako                                                                                  | Cat# 194-08311  |
| BlockingOne                                                | Nacalai tesque                                                                        | Cat# 03953-95   |
| RNase T1                                                   | Thermo Fisher Scientific                                                              | Cat# EN0541     |
| TURBO™ DNase                                               | Thermo Fisher Scientific                                                              | Cat# AM2238     |
| Dynabeads™ Protein G                                       | Thermo Fisher Scientific                                                              | Cat# 10004D     |
| CIP                                                        | Takara                                                                                | Cat# 2250A      |
| T4 RNA ligase1                                             | New England Biolabs                                                                   | Cat# M0204S     |
| NuPAGE® MOPS SDS Running Buffer                            | Thermo Fisher Scientific                                                              | Cat# NP0001     |
| Proteinase K                                               | Roche                                                                                 | Cat# 3115879001 |
| Acid phenol :CHCL3                                         | Thermo Fisher Scientific                                                              | Cat# AM9720     |
| Pseudouridine                                              | Carbosynth                                                                            | Cat# NP09389    |
| KCL                                                        | Wako                                                                                  | Cat# 163-03545  |
| PMSF                                                       | Sigma Aldrich                                                                         | Cat# P7626      |
| DTT                                                        | Sigma Aldrich                                                                         | Cat# D0632      |
| MgCL2                                                      | Sigma Aldrich                                                                         | Cat# 19-0220-5  |
| isopropyl-β-D thiogalactopyranoside                        | Nacalai tesque                                                                        | Cat# 19742-36   |
| β-mercaptoethanol                                          | Wako                                                                                  | Cat# 131-14572  |
| imidazole                                                  | Wako                                                                                  | Cat# 093-00011  |
| phenylmethylsulfonyl fluoride                              | Wako                                                                                  | Cat# 800263     |
| NH4CL                                                      | Wako                                                                                  | Cat# 017-02995  |
| Nuclease P1                                                | New England Biolabs                                                                   | Cat# M0660S     |
| CMC                                                        | Tokyokasei                                                                            | Cat# C0793      |
| Bicine                                                     | DOJINDO                                                                               | Cat# 150-25-4   |
| Na2CO3                                                     | Wako                                                                                  | Cat# 197-01581  |
| Dideoxynucleoside Triphosphate Set                         | Sigma Aldrich                                                                         | Cat# 3732738001 |
| phenol/chloroform/isoamyl alcohol                          | NIPPON GENE                                                                           | Cat# 311-90151  |
| RQ1 Dnase                                                  | Promega                                                                               | Cat# M610A      |
| Rnasin® Plus                                               | Promega                                                                               | Cat# N261B      |
| Clean Blot IP Detection Reagent (HRP)                      | Thermo Fisher Scientific                                                              | Cat# 21230      |
| <b>Software</b><br><i>Include version where applicable</i> |                                                                                       |                 |
| Bioconductor                                               | <a href="https://www.bioconductor.org/">https://www.bioconductor.org/</a>             | n/a             |
| FastQC                                                     | <a href="https://github.com/s-andrews/FastQC">https://github.com/s-andrews/FastQC</a> | n/a             |
| featureCounts                                              | Liao et al., 2014                                                                     | n/a             |

|                                                                                                                                                                                    |                                                                     |                                                                                                                           |
|------------------------------------------------------------------------------------------------------------------------------------------------------------------------------------|---------------------------------------------------------------------|---------------------------------------------------------------------------------------------------------------------------|
| Bowtie2                                                                                                                                                                            | Langmead and Salzberg, 2012                                         | <a href="http://bowtie-bio.sourceforge.net/bowtie2/index.shtml">http://bowtie-bio.sourceforge.net/bowtie2/index.shtml</a> |
| SAMtools                                                                                                                                                                           | Li et al., 2009                                                     | <a href="http://www.htslib.org">http://www.htslib.org</a>                                                                 |
| cutadapt (v.1.2.1)                                                                                                                                                                 | Martin, 2011                                                        | <a href="http://cutadapt.readthedocs.io/en/stable/guide.html">http://cutadapt.readthedocs.io/en/stable/guide.html</a>     |
| FASTX-toolkit (v0.0.14)                                                                                                                                                            | Hannon Lab                                                          | <a href="http://hannonlab.cshl.edu/fastx_toolkit/">http://hannonlab.cshl.edu/fastx_toolkit/</a>                           |
| RSeQC (v2.6.4)                                                                                                                                                                     | Wang et al., 2012                                                   | <a href="http://rseqc.sourceforge.net/">http://rseqc.sourceforge.net/</a>                                                 |
| bedtools (v2.26.0)                                                                                                                                                                 | Quinlan and Hall, 2010                                              | <a href="http://bedtools.readthedocs.io/en/latest/">http://bedtools.readthedocs.io/en/latest/</a>                         |
| seqkit                                                                                                                                                                             | Shen et al., 2016                                                   | <a href="https://bioinf.shenwei.me/seqkit/">https://bioinf.shenwei.me/seqkit/</a>                                         |
| MEME                                                                                                                                                                               | Bailey et al., 2009                                                 | v.4.9.1. <a href="http://meme-suite.org">http://meme-suite.org</a>                                                        |
| IGV                                                                                                                                                                                | Robinson et al., 2011                                               | <a href="https://software.broadinstitute.org/software/igv/">https://software.broadinstitute.org/software/igv/</a>         |
| tRNAscan-SE 2.0                                                                                                                                                                    | Low et al., 2016                                                    | <a href="http://lowelab.ucsc.edu/tRNAscan-SE/">http://lowelab.ucsc.edu/tRNAscan-SE/</a>                                   |
| R                                                                                                                                                                                  | <a href="https://www.r-project.org/">https://www.r-project.org/</a> | n/a                                                                                                                       |
| ImageJ                                                                                                                                                                             | Schneider et al., 2012                                              | <a href="https://imagej.nih.gov/ij/">https://imagej.nih.gov/ij/</a>                                                       |
| <b>Other</b><br><i>(Kits, instrumentation, laboratory equipment, lab ware etc. that are critical for the experimental procedure and do not fit in any of the above categories)</i> |                                                                     |                                                                                                                           |
| NEPA21 Super Electroporator                                                                                                                                                        | NEPAGENE                                                            | Cat# NEPA21                                                                                                               |
| ECO DROPPER III                                                                                                                                                                    | AS ONE                                                              | Cat# ICT-896III                                                                                                           |
| ARVO X3                                                                                                                                                                            | Perkin Elmer                                                        | Cat# 2030-0030A                                                                                                           |
| MicroSpin G-25 Columns                                                                                                                                                             | GE Healthcare                                                       | Cat# 27532501                                                                                                             |
| Hybond-N+                                                                                                                                                                          | GE Healthcare                                                       | Cat# RPN203B                                                                                                              |
| nitrocellulose membrane (Amersham Protran NC 0.2)                                                                                                                                  | GE Healthcare                                                       | Cat# 10600001                                                                                                             |
| 7900HT Fast Real-Time PCR System                                                                                                                                                   | Thermo Fisher Scientific                                            | Cat# 7900HT                                                                                                               |
| PVDF (Immobilon® Membrane, 0.45um)                                                                                                                                                 | Merck Millipore                                                     | Cat# IPVH00010                                                                                                            |
| CL-1000 Ultraviolet Crosslinker                                                                                                                                                    | UVP                                                                 | Cat# 95-0174-03                                                                                                           |
| Bioraptor® UCD-300                                                                                                                                                                 | Cosmo BIO                                                           | Cat# UCD-300                                                                                                              |
| NuPAGE™ 10% Bis-Tris gel                                                                                                                                                           | Thermo Fisher Scientific                                            | Cat# NP0301BOX                                                                                                            |
| Qubit3.0                                                                                                                                                                           | Thermo Fisher Scientific                                            | Cat# Q33216                                                                                                               |
| TapeStation 2100 Bioanalyzer                                                                                                                                                       | Agilent technologies                                                | n/a                                                                                                                       |
| Illumina MiSeq                                                                                                                                                                     | Illumina                                                            | Cat# SY-410-1003                                                                                                          |
| Ni-NTA agarose column                                                                                                                                                              | QIAGEN                                                              | Cat# 30210                                                                                                                |

|                                                          |                          |                   |
|----------------------------------------------------------|--------------------------|-------------------|
| HiTrap Heparin column                                    | GE Healthcare            | Cat# 17040601     |
| HiLoad 16/60 Superdex 200 column                         | GE Healthcare            | Cat# 28989335     |
| TLC, Cellulose                                           | Merck Millipore          | Cat# 1.05716.0001 |
| PrimeSTAR Mutagenesis Basal Kit                          | Takara                   | Cat# R046A        |
| Nano Glo HiBiT Lytic Detection System                    | Promega                  | Cat# N2420        |
| Dual-Glo Luciferase Assay System                         | Promega                  | Cat# E2920        |
| SuperScript™ III First-Strand Synthesis System           | Thermo Fisher Scientific | Cat# 18080051     |
| TaqMan™ MicroRNA Reverse Transcription Kit               | Thermo Fisher Scientific | Cat# 4366596      |
| TaqMan™ MicroRNA Assays; See Table S4.                   | Thermo Fisher Scientific | n/a               |
| mirVana™ miRNA Isolation kit                             | Thermo Fisher Scientific | Cat# AM1560       |
| Megaplex™ RT Primers, Pool A (human)                     | Thermo Fisher Scientific | Cat# 4399966      |
| TaqMan™ Array Human MicroRNA A Cards v2.0                | Thermo Fisher Scientific | Cat# 4398965      |
| ECL Select Western Blotting Detection Reagent            | GE Healthcare            | Cat# RPN2235      |
| Phusion High Fidelity DNA Polymerase                     | New England Biolabs      | Cat# M0530        |
| NEB Next Library Quant Kit for Illumina                  | New England Biolabs      | Cat# E7630S       |
| MiSeq Reagent Kit v3                                     | Illumina                 | Cat# 15043893     |
| MEGA script T7 transcription Kit                         | Thermo Fisher Scientific | Cat# AM1333       |
| RNeasy MinElute Cleanup kit                              | QIAGEN                   | Cat# 74204        |
| RealTime-Glo MT Cell Viability Assay                     | Promega                  | Cat# G9712        |
| High Sensitivity DNA Kit                                 | Agilent technologies     | Cat# 5067-4626    |
| Decade Markers System (to make radiolabeled RNA markers) | Thermo Fisher Scientific | Cat# AM7778       |
