# Supplementary material
Source: PubMed Central journal article supplement (PMC7560213)
Supplement: EMBJ-39-e104708-s002.pdf [file EMBJ-39-e104708-s002.pdf]

## Expanded View Figures

**Figure EV1. Schematic model of cell-based functional screen and knockdown of TruB1 repressed expression of relative miRNAs in various human cells.**

- A Repressors of maturation such as Lin28 lead to high luciferase activity, and activators lead to low luciferase activity. This cell-based screen is assaying for a function directly on endogenous let-7 maturation, rather than affinity/binding. The gain-of-function screen also enables to identify regulatory factors that may cause lethality under loss of function conditions, such as with Crispr-Cas9 or RNAi-KD screens.
- B qRT-PCR analysis for TruB1 mRNA expression normalized to GAPDH with TruB1 KD or ctrl (siRNA). TruB1 KD by siRNA significantly repressed the expression of TruB1 mRNA in HEK-293FT cells. Error bars show SD;  $n = 3$ . Significance was assessed using 2-tailed Student's  $t$ -test,  $< 0.05^*$ .
- C qRT-PCR analysis for let-7 families levels in A549 cells with TruB1 KD or ctrl (siRNA). TruB1 KD by siRNA significantly repressed the expression of the let-7 family. Error bars show SD;  $n = 3$ . Significance was assessed using 2-tailed Student's  $t$ -test,  $< 0.05^*$ .

Source data are available online for this figure.

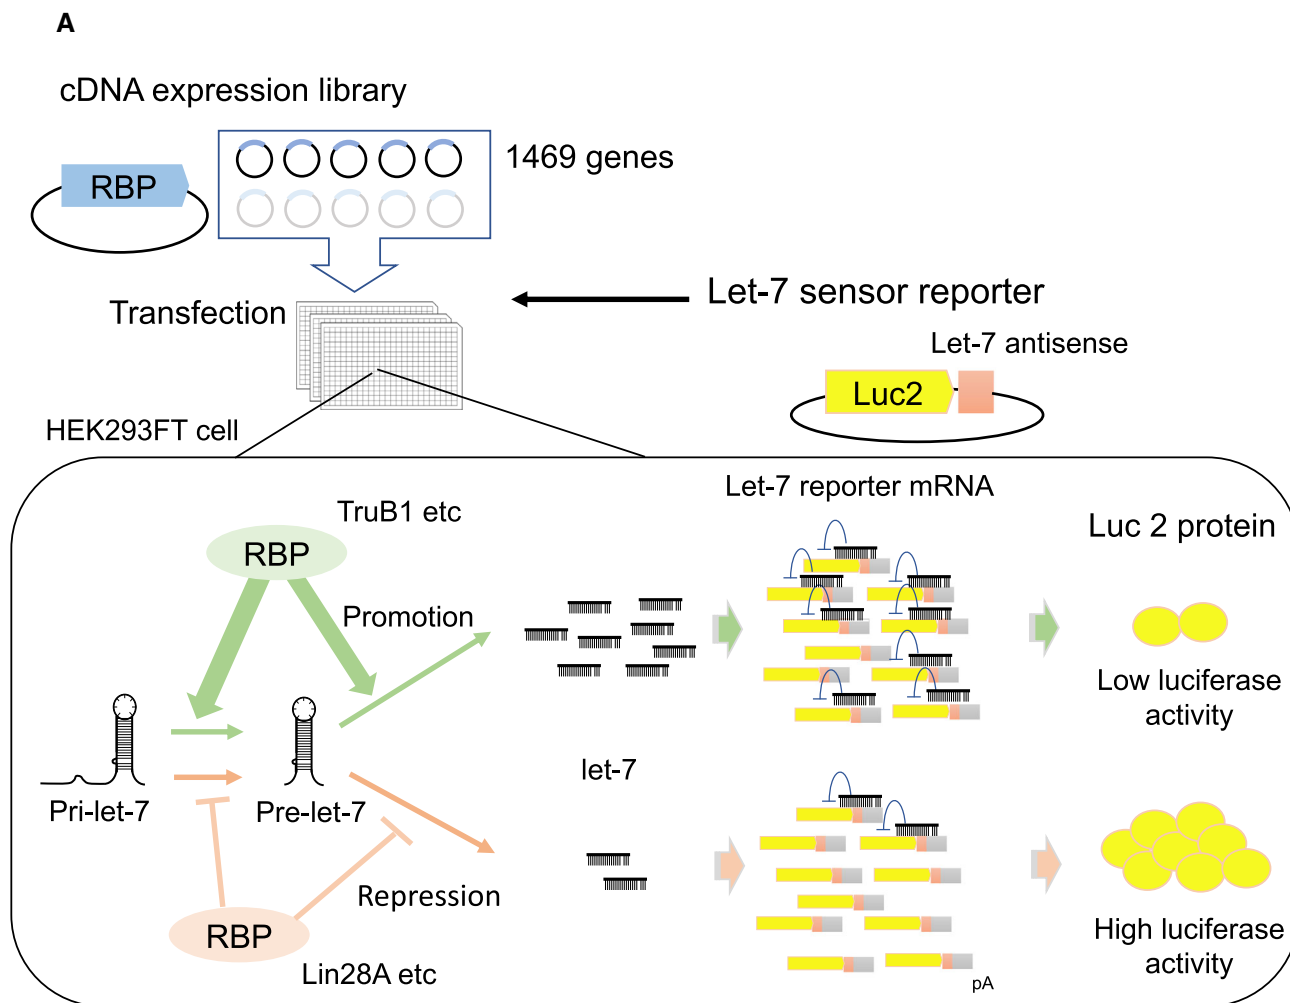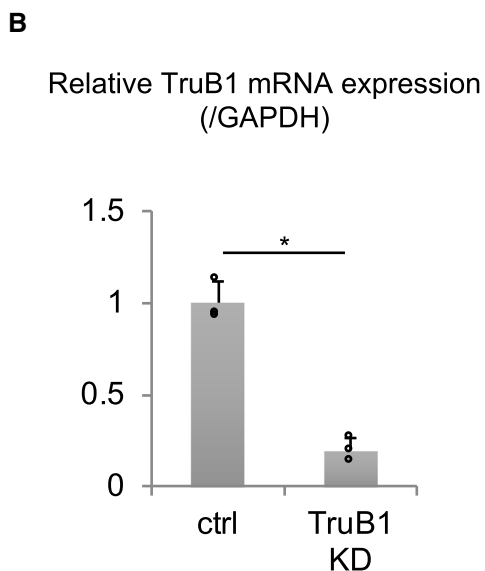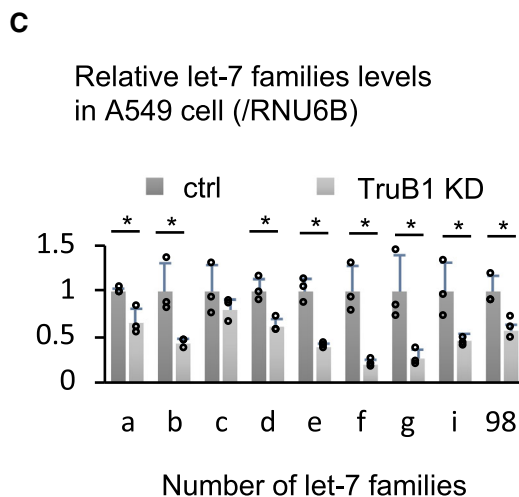

Figure EV1.

**Figure EV2. Impact of pseudouridylation enzyme activity on microprocessing of let-7.**

- A EMSA of 32p-ATP-labeled tRNA<sup>Phe</sup> mixed with recombinant TruB1, mt1, or mt2 at several doses. RNP: Ribonucleoprotein complexes.
- B Protein expression of Flag-tagged TruB1 and its mutants. Protein expression was evaluated by Western blotting. Protein was isolated from HEK-293FT cells infected with tetracycline-inducible lentiviruses expressing TruB1, mt1, or, mt2, 5 days after doxycycline treatment.
- C Location of pseudouridine sites were detected by CMC primer extension. Total RNA purified from HEK-293FT cells was treated with CMC. CMC-treated RNA were reverse-transcribed with RI-labeled specific primers for pri-let-7a1. ddATP was used as a sequence control.
- D, E *In vitro* processing analysis for pri-let-7 with pseudouridine. 32p-ATP-labeled pri-let-7a1 was synthesized using UTP: pseudouridine at a ratio of 1:1 or 1:0. This labeled RNA was treated with whole cell lysate from TruB1 expressing HEK293FT cells transfected with pcDNA3.1-TruB1. Autoradiographed image (D) and the relative processing rate (E) are shown. Error bars show SD; *n* = 3. Significance was assessed using 2-tailed Student's *t*-test.

Source data are available online for this figure.

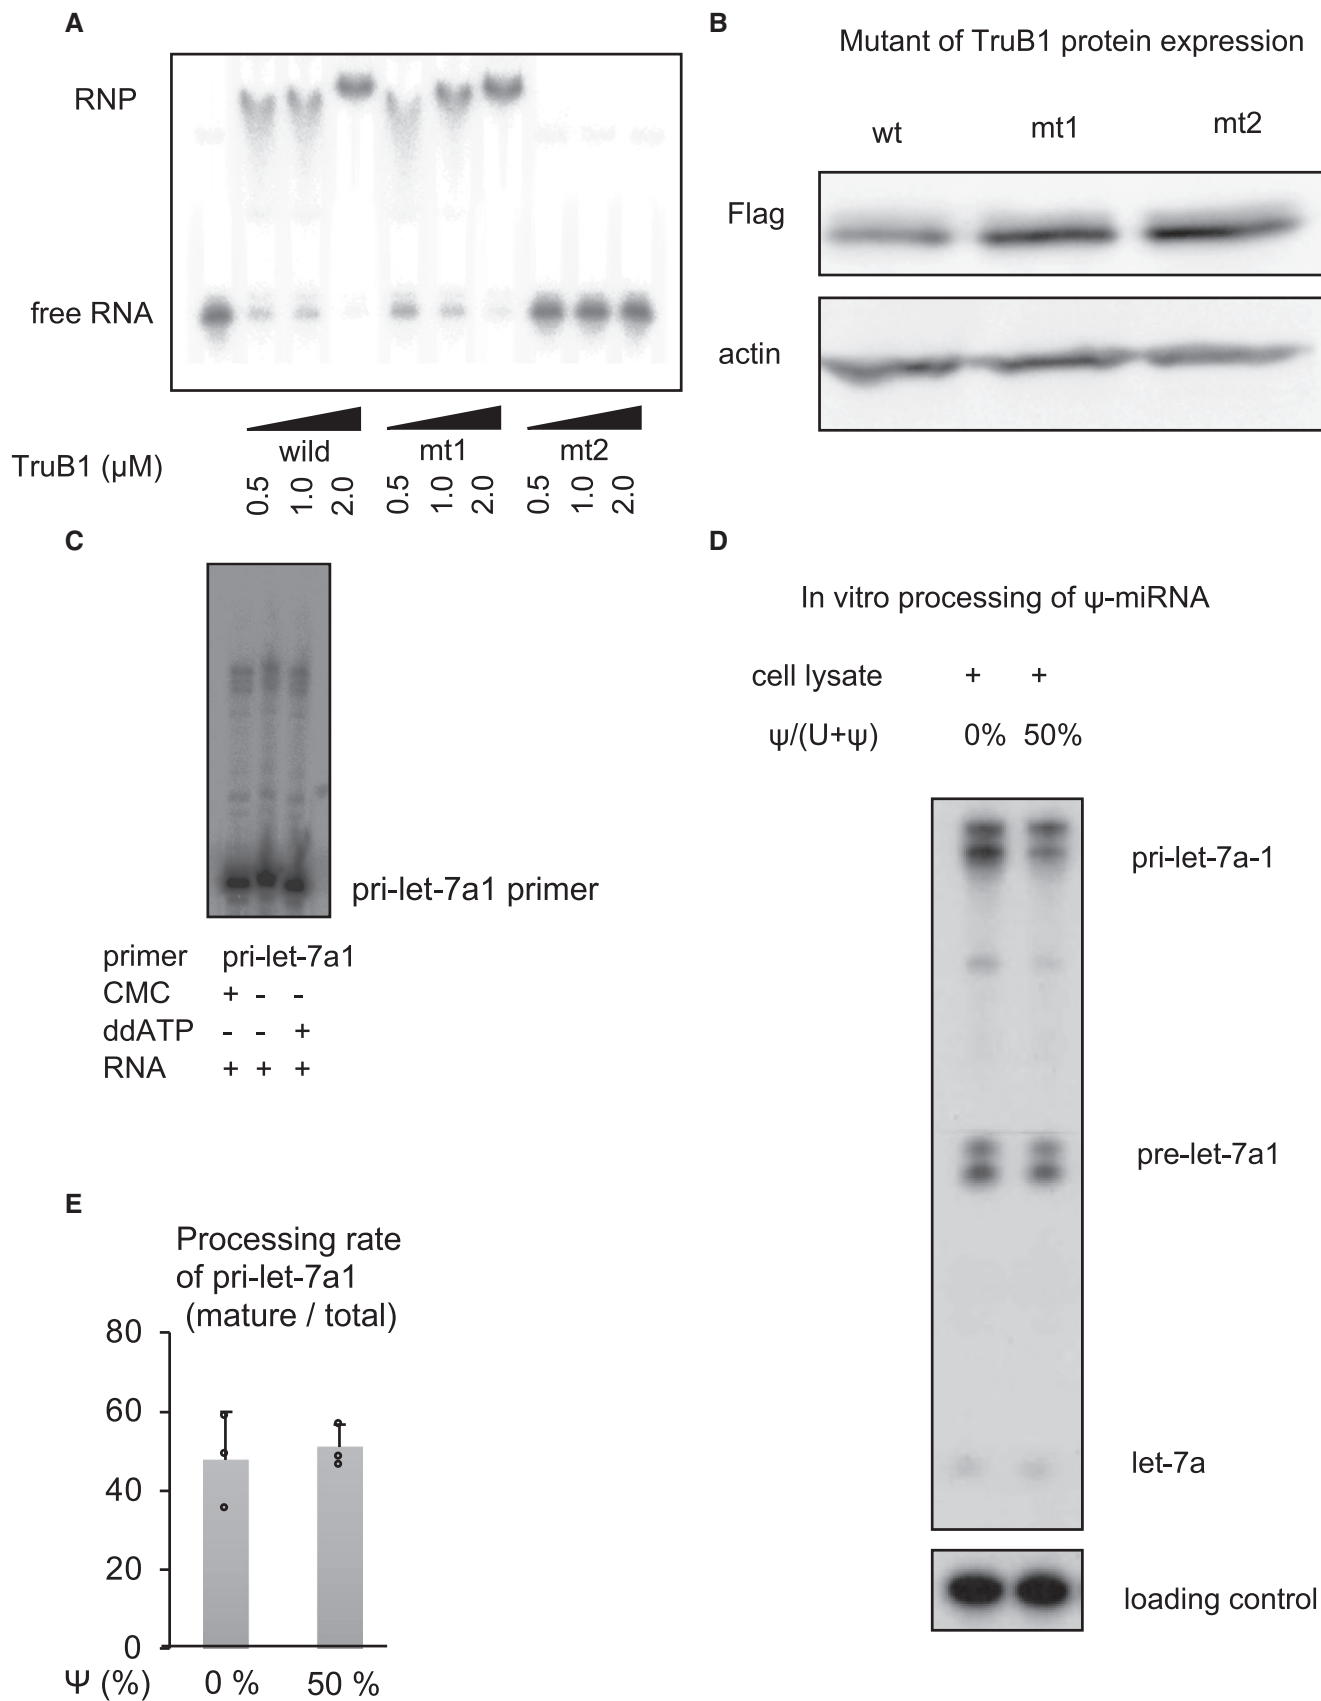

Figure EV2.

**Figure EV3. Loop mutant of pri-let7a1 and HITS-CLIP for TruB1.**

- A Loop sequence of mutant RNA in which the loop structure of pri-let-7a1 was modified (loop mt).
- B Protein expression of 3 x Flag-tagged TruB1 in genome edited cells. Flag-tagged TruB1 was most highly expressed in ED-9 cells.
- C Western blotting for input and IP samples in HITS-CLIP.
- D Autoradiography of RI-labeled RNA in a complex with TruB1 (black frame).
- E Agilent data of cDNA library show smeared band at 150–250 bp.
- F Mapped reads of sequenced data to human genome.

Source data are available online for this figure.

**A**

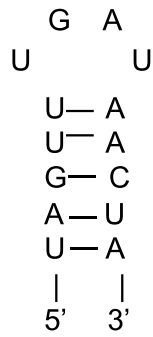

**B**

3xFlag immunoblotting to knocked-in cell

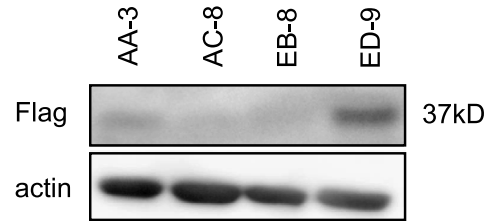

**C**

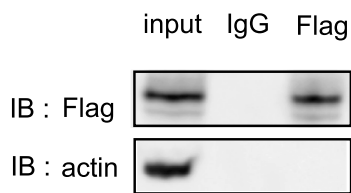

**D**

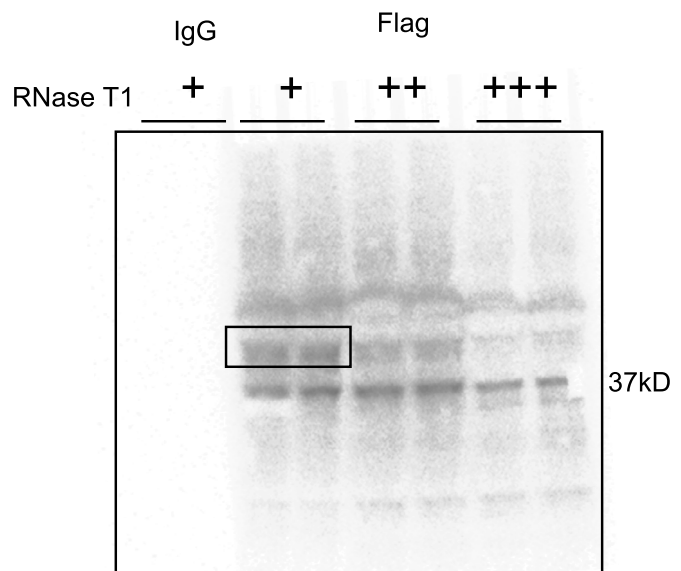

**E**

Agilent data of HITS-CLIP library

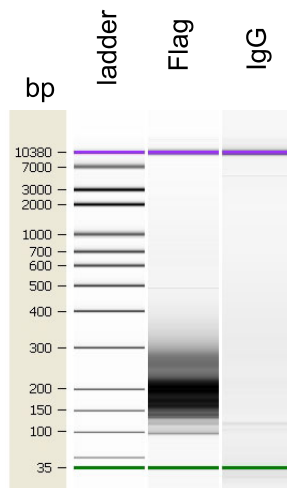

**F**

HITS-CLIP sequence result

|                 |           |
|-----------------|-----------|
| Total Sequence  | : 4883001 |
| Sequence length | : 10-96   |
| %GC             | : 61%     |

| Transcript ID  | number |
|----------------|--------|
| protein coding | 45970  |
| tRNA           | 20496  |
| lncRNA         | 20011  |
| miRNA          | 1210   |
| Others         | 17965  |

Figure EV3.

**Figure EV4. TruB1 selectively enhances binding of DGCR8 to primary let-7.**

- A RIP assay of pri-microRNAs and DGCR8 from HEK-293FT cells with TruB1 KD or ctrl (siRNA). RNA was extracted from IP material and analyzed by qRT-PCR. Significance was assessed using 2-tailed Student's *t*-test, < 0.05\*.
- B Immunoprecipitation of Flag-tagged TruB1 and DGCR8 in HEK-293FT cells. Western blotting for input or IP material using anti-Flag antibody, anti-DGCR8 antibody, and anti-actin antibody are shown.
- C Relative pri-let-7a1 expression in HEK-293 cells with knockdown of Lin28B or ctrl (siRNA). qRT-PCR analysis for pri-let-7a1 expression normalized to GAPDH. Lin28B KD by siRNA tended to increase the expression of pri-let-7a1, but this was not statistically significant.

Data information: Error bar shows SD; *n* = 3.

Source data are available online for this figure.

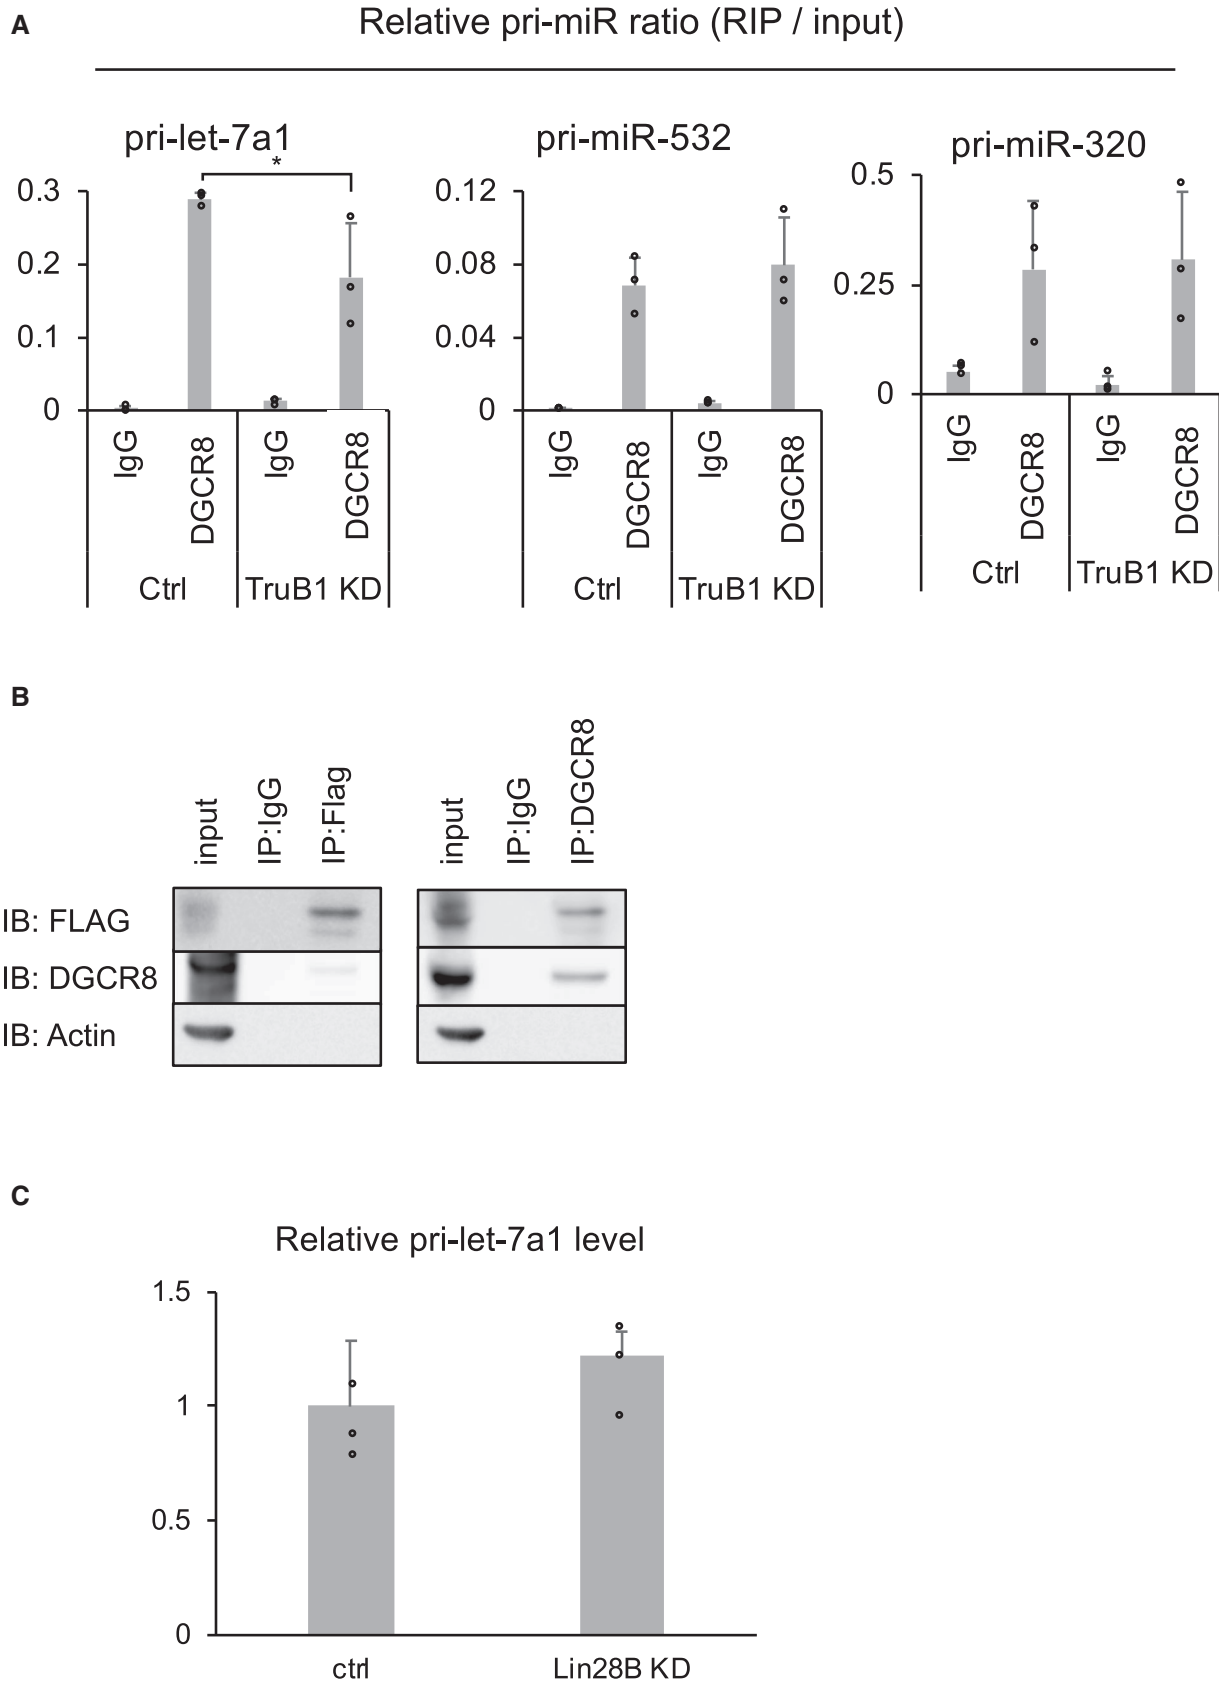

Figure EV4.



**Figure EV5. TruB1 suppressed tumor progression.**

- A TruB1 and mt1 suppressed cell proliferation. Real-time qPCR assay for HEK-293 cells infected with tetracycline-inducible lentiviruses expressing TruB1, mt1, or GFP, 5 days after doxycycline treatment. TruB1 and mt1 suppressed cell proliferation. Error bars show SD;  $n = 3$ . Significance was assessed using 2-tailed Student's  $t$ -test,  $< 0.05^*$ .
- B–D Relationship between TruB1, let-7, and tumor progression in various cancers. (B) Published microarray and microRNA sequencing in prostate biopsy samples from patients with prostate cancer (data accessible at NCBI GEO database (Edgar *et al*, 2002), accession GSE64333, Wang *et al*, 2015a; Data ref: Wang *et al*, 2015b). In these data, there were correlations between the expression levels of TruB1 and both let-7b and let-7i. Regarding let-7a, a statistically significant correlation was not found, but the same tendency was observed. Significance was assessed using Pearson product-moment correlation coefficient. Regression lines were showed by red lines (C, D). TruB1 inversely correlates with tumor progression or oncogenesis in prostate cancer (C) and in pancreatic cancer (D). LD: local disease. Data from Varambally *et al*, 2005a; Data ref: Varambally *et al*, 2005b; Pei *et al*, 2009a; Data ref: Pei *et al*, 2009b. Error bar shows SD. Significance was assessed using 2-tailed Student's  $t$ -test,  $< 0.05^*$ . The numbers of cases (C) were as follows: benign ( $n = 6$ ), LD ( $n = 7$ ), and ED ( $n = 6$ ). The numbers of cases (D) were as follows: Cancer ( $n = 36$ ) and normal ( $n = 16$ ).

Source data are available online for this figure.

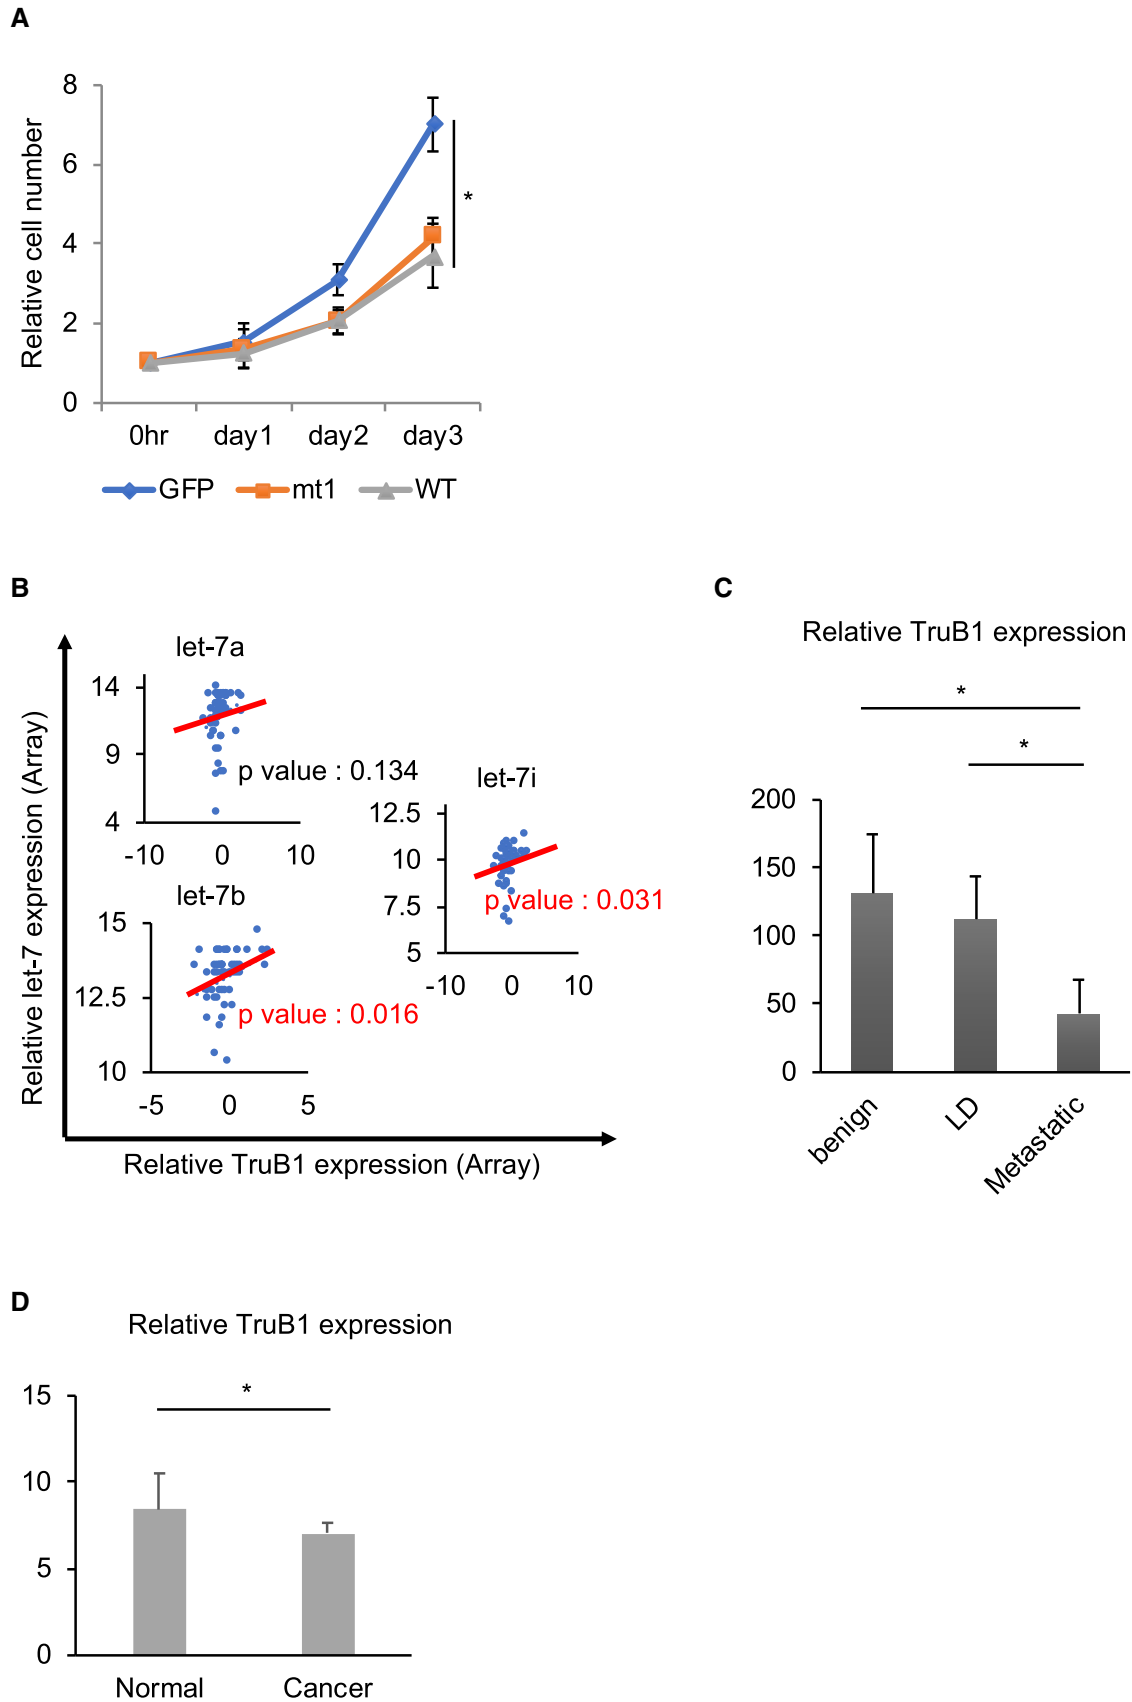

Figure EV5.
